# Supplementary material
Source: PubMed Central journal article supplement (PMC6092225)
Supplement: NIHMS969465-supplement-S1.pdf [file NIHMS969465-supplement-S1.pdf]

## SUPPLEMENTAL MATERIALS:

### SUPPLEMENTAL FIGURE 1.

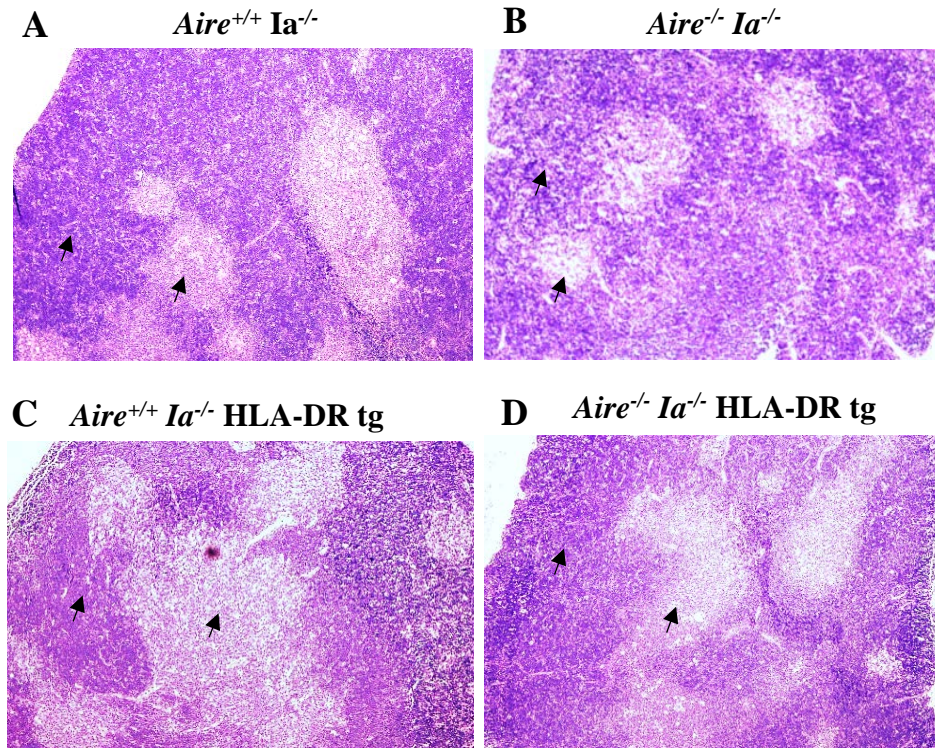

**SUPPLEMENTAL FIGURE 1.** Thymus histology of *Aire*<sup>-/-</sup> and *Aire*<sup>+/+</sup> *Ia*<sup>-/-</sup> and/or HLA-DR2 tg mice. H&E staining for thymus of (A) *Aire*<sup>+/+</sup> *Ia*<sup>-/-</sup>, (B) *Aire*<sup>-/-</sup> *Ia*<sup>-/-</sup> and (C) *Aire*<sup>+/+</sup> *Ia*<sup>-/-</sup> HLA-DR tg, (D) *Aire*<sup>-/-</sup> *Ia*<sup>-/-</sup> HLA-DR tg mice. Arrows indicate thymic cortex and medulla, respectively.

## SUPPLEMENTAL FIGURE 2.

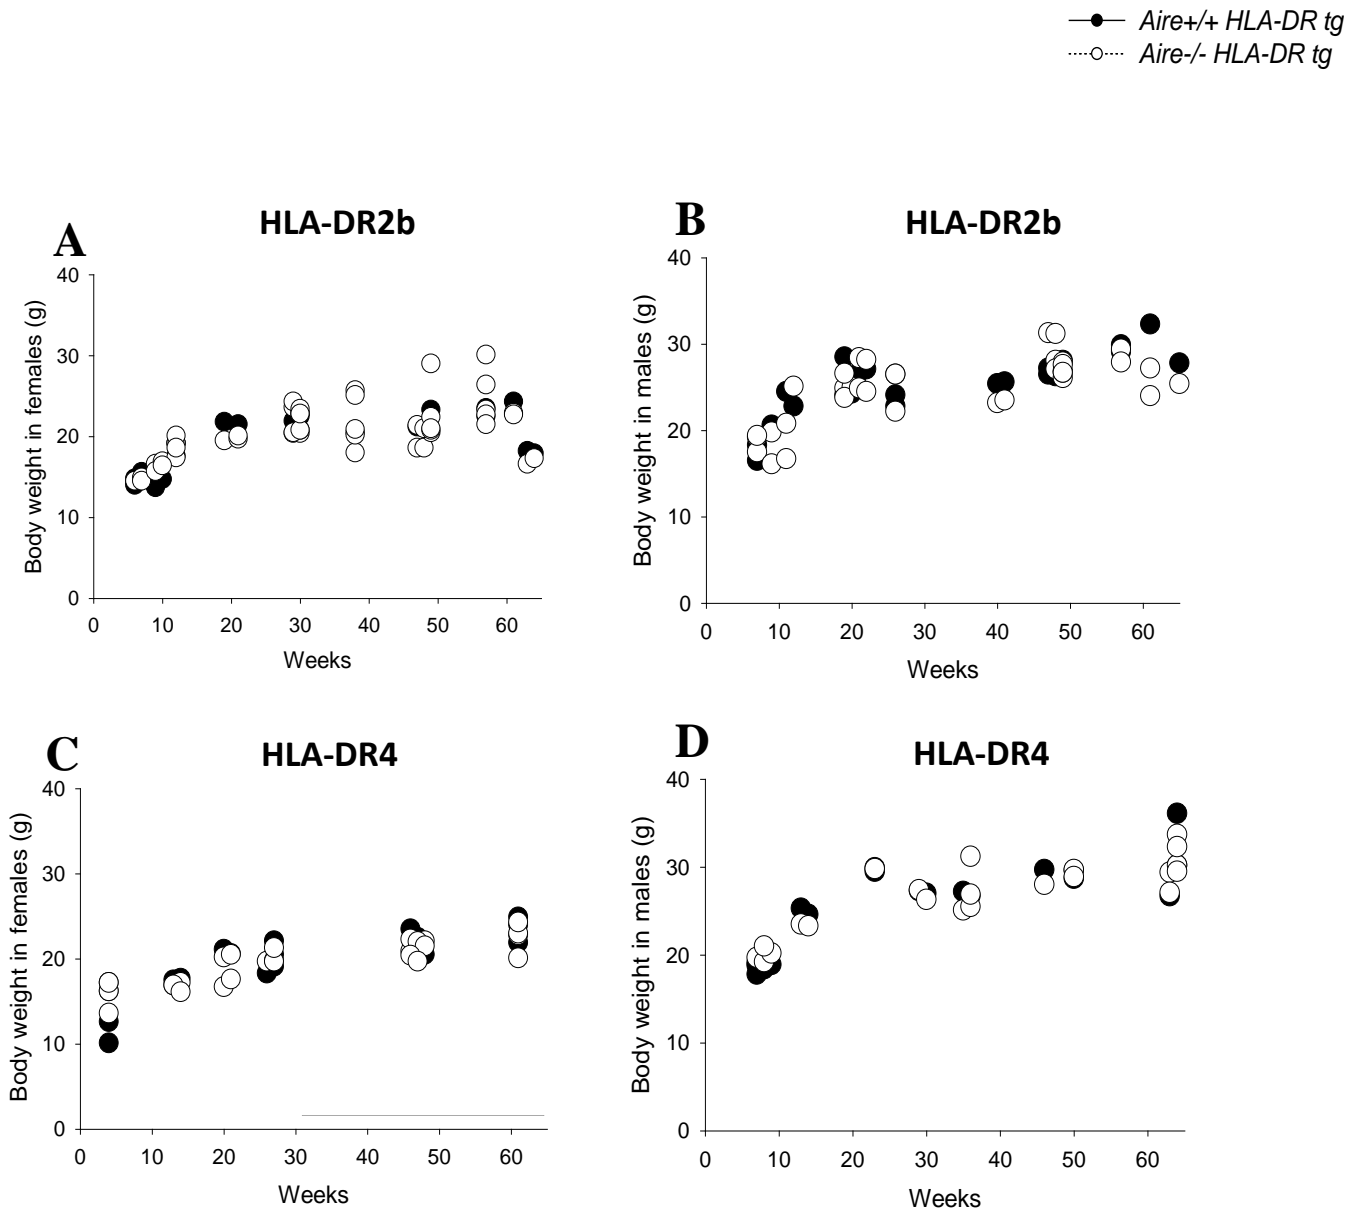

**SUPPLEMENTAL FIGURE 2.** Comparison of body weight between *Aire*<sup>-/-</sup> and *Aire*<sup>+/+</sup> HLA-DR2b or HLA-DR4 mice. Shown are the body weights of (A) female and (B) male *Aire*<sup>-/-</sup> vs *Aire*<sup>+/+</sup> HLA-DR2b tg mice at different ages. Shown in (C) are body weights of female and (D) male *Aire*<sup>-/-</sup> vs *Aire*<sup>+/+</sup> HLA-DR4 tg mice at different ages. Symbols represent individual mice. No significant differences were observed (t-test).
